# Supplementary material for: ZnO Nano-Rod Devices for Intradermal Delivery and Immunization
Source: Nanomaterials (Basel). 2017 Jun 15;7(6):147. doi: 10.3390/nano7060147 (PMC5485794; doi:10.3390/nano7060147)
Supplement: Supplementary file 1 [file nanomaterials-07-00147-s001.pdf]

# ZnO nano-rod devices for intradermal delivery and immunization

Tapas R. Nayak<sup>1</sup>, Wang Hao<sup>2</sup>, Aakansha Pant<sup>1</sup>, Minrui Zheng<sup>3</sup>, Hans Junginger<sup>1</sup>, Wei Jiang Goh<sup>1,4</sup>, Choon Keong Lee<sup>1</sup>, Shui Zou<sup>1</sup>, Sylvie Alonso<sup>5</sup>, Bertrand Czarny<sup>6</sup>, Gert Storm<sup>7</sup>, Chong Haur Sow<sup>3</sup>, Chengkuo Lee<sup>2\*</sup> and Giorgia Pastorin<sup>1,3,8,\*</sup>

## Supplementary Materials

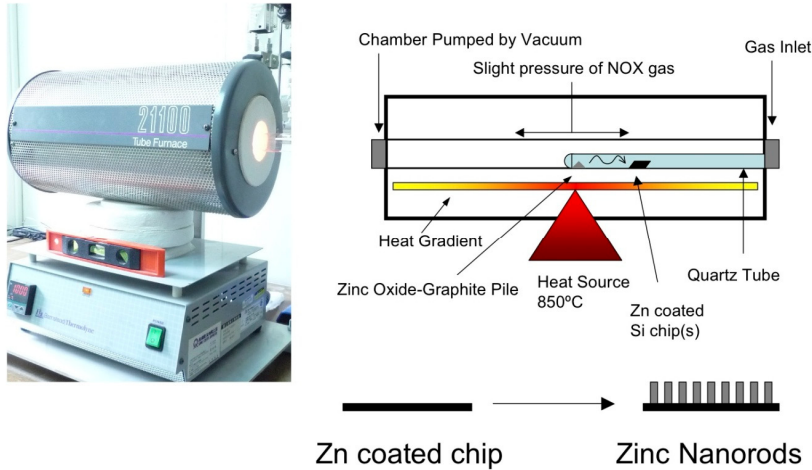

**Figure S1.** Left: example of a tube furnace for CVD. Right: Schematic representation of CVD process with zinc nanorods. Chip is inserted at a defined length from a pile of zinc oxide-graphite and the center is heated to 850°C. With vacuum, a slight pressure of NOX gas is allowed to reside in the chamber and the vaporized zinc oxide deposits on the chip to form nano-rods.

| Sample<br>(every 3<br>hours) | Prot<br>( $\mu$ l) | Average<br>OD at 595<br>nm ( $\times 10^{-3}$ ) | Protein<br>concentratio<br>n ( $\mu$ g/ml) | Total quantity of<br>Protein<br>( $\mu$ g) |
|------------------------------|--------------------|-------------------------------------------------|--------------------------------------------|--------------------------------------------|
| Blank                        | 0                  | 0.00                                            | 0.0                                        | 0.0                                        |
| 3 hrs                        | 20                 | 6.39                                            | 31.4                                       | 47.10                                      |
| 6 hrs                        | 20                 | 4.22                                            | 20.7                                       | 31.05                                      |
| 9 hrs                        | 20                 | 3.81                                            | 18.7                                       | 28.05                                      |
| 12 hrs                       | 20                 | 3.05                                            | 12.7                                       | 19.05                                      |
| 15 hrs                       | 20                 | 3.46                                            | 16.9                                       | 25.35                                      |
| 18 hrs                       | 20                 | 3.38                                            | 16.6                                       | 24.90                                      |
| 21 hrs                       | 20                 | 1.86                                            | 9.1                                        | 13.65                                      |
| 24 hrs                       | 20                 | 0.46                                            | 2.3                                        | 3.45                                       |
|                              |                    |                                                 |                                            | Total: 192.60                              |

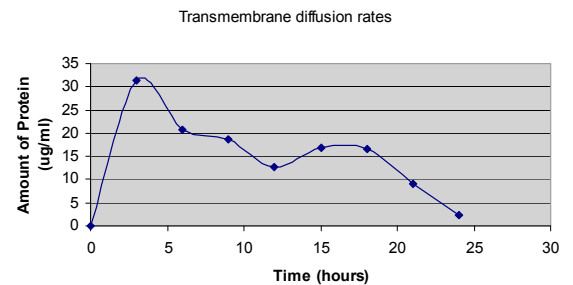

**Table T1:** Bradford quantitative albumin-FITC protein assay after skin penetration, calculated from the fluids collected every 3 hours.

| Protein sample                                               | OD (595nm)                 | Average OD        | Protein quantity(mg) |
|--------------------------------------------------------------|----------------------------|-------------------|----------------------|
| Protein sample before adsorption on to chip (stock solution) | 0.9486<br>0.9463<br>0.9545 | 0.9498 (SD 0.004) | 5.397                |
| Protein sample after adsorption onto chip                    | 0.8012<br>0.7982<br>0.7967 | 0.7987 (SD 0.002) | 4.544                |
| Protein adsorbed onto the chip                               | -                          |                   | 0.853                |
| Protein sample from washing of chip                          | 0.0431<br>0.0461<br>0.0479 | 0.0457 (SD 0.002) | 0.302                |
| Protein sample collected from receptor chamber               |                            |                   | 0.193                |

**Table T2:** Analysis of quantity of albumin-FITC adsorbed on to the chip and amount released into the skin during the *in vitro* skin penetration study by Bradford assay. Where possible, the experiments were repeated in triplicates.

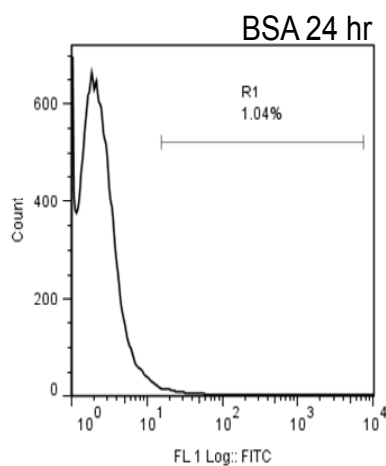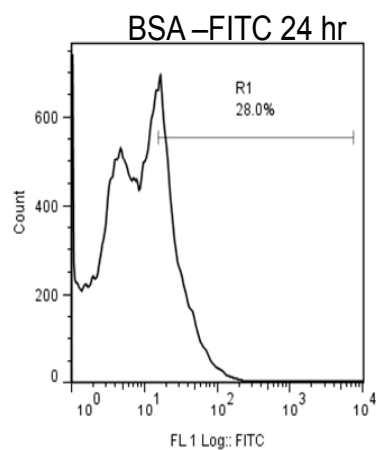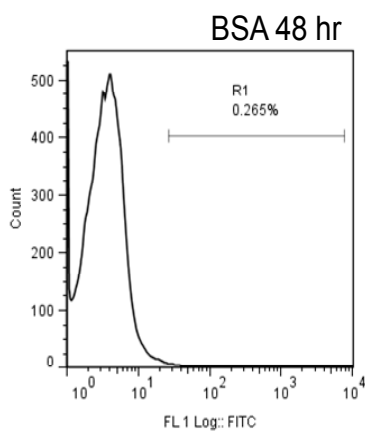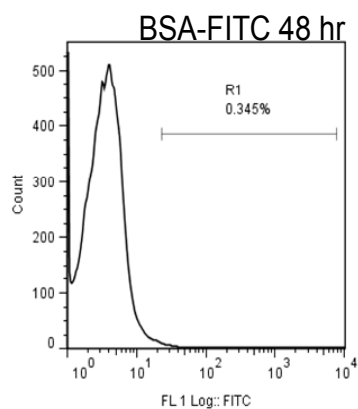

**Figure S2:** Antigen migration to the lymph nodes. After 24 hr the antigen BSA-FITC is delivered to the lymph nodes by dendritic cells in the immune system and this time point was taken as a reference while using the nanochips.

31  
32

| Group  | # mice | Treatment Day 0 | Treatment Day 15 |          |          |          |          |                                      |
|--------|--------|-----------------|------------------|----------|----------|----------|----------|--------------------------------------|
| Chip   | 4      | OVA-Alum Chip   | OVA-Alum SC      | OVA-CHP1 | OVA-CHP2 | OVA-CHP3 | OVA-CHP4 | Average & SD of protein on chips 1-4 |
| Naive  | 4      | -----           | -----            | 13.22    | 34.29    | 26.80    | 21.12    | 23.9±8.9                             |
| PBS-SC | 4      | PBS             | OVA-Alum SC      |          |          |          |          |                                      |

33  
34  
35  
36

**Table T3.** Estimation of the protein delivered by nanochips on day 0 of the treatment, as calculated by Pierce-BCA assay. Naïve: no treatment. SC: sub-cutaneous injection.

| Antibody titres      |  | naive1 | naive2 | naive3 | naive4 | AVE+SD naïve            | PBS-SC1 | PBS-SC2 | PBS-SC3 | PBS-SC4 | AVE+SD PBS            | chip1  | chip2  | chip3  | chip4  | AVE+SD chips          |
|----------------------|--|--------|--------|--------|--------|-------------------------|---------|---------|---------|---------|-----------------------|--------|--------|--------|--------|-----------------------|
| <b>d14post prime</b> |  | 0.23   | 0.219  | 0.2405 | 0.24   | 0.232375<br>(SD 0.0101) | 0.28    | 0.2685  | 0.229   | 0.317   | 0.2736<br>(SD 0.036)  | 0.266  | 0.2575 | 0.212  | 0.329  | 0.2661<br>(SD 0.0481) |
| <b>d7 post boost</b> |  | 0.1365 | 0.1795 | 0.1445 | 0.146  | 0.1516<br>(SD 0.0190)   | 0.259   | 0.1265  | 0.255   | 0.2115  | 0.213<br>(SD 0.0615)  | 0.7595 | 0.1965 | 0.597  | 0.416  | 0.4923<br>(SD 0.2420) |
| <b>d14post boost</b> |  | 0.148  | 0.2055 | 0.154  | 0.143  | 0.162625<br>(SD 0.0289) | 1.4135  | 1.334   | 1.611   | -       | 1.4528<br>(SD 0.1426) | 1.7365 | 1.9975 | 1.1445 | 1.3535 | 1.558<br>(SD 0.3820)  |

**Table T4.** Total anti-OVA serum IgG titres at day 14 after intradermal priming with chips at day 7 and day 14 after sub-cutaneous booster immunization. Strangely, anti IgG antibody titres were not detectable for the PBS-SC4 sample after 14 days post-boost.
